# Supplementary material
Source: publisher figshare collection journal article supplement (https://frontiersin.figshare.com/ndownloader/files/13865669)
Supplement: Supplementary file [file 13865669]

## Supplementary Material

# Phylogenomic Analysis of the Gammaproteobacterial Methanotrophs (Order *Methylococcales*) Calls for the Reclassification of Members at the Genus and Species Levels

Fabini D. Orata\*, Jan P. Meier-Kolthoff, Dominic Sauvageau<sup>†</sup>, and Lisa Y. Stein<sup>†</sup>

\*Correspondence: Fabini D. Orata, orata@ualberta.ca

<sup>†</sup>These authors contributed equally to this work.

## 1. Supplementary Tables

Supplementary Table S1. 16S rRNA and PmoA sequences used in this study.

| Species and strain                                      | Accession numbers |            |
|---------------------------------------------------------|-------------------|------------|
|                                                         | 16S rRNA          | PmoA       |
| <i>Clonothrix fusca</i> AW-b*                           | DQ984190.1        | ABL64049.1 |
| <i>Crenothrix polyspora</i> clone 4*                    | DQ295895.1        | —          |
| <i>Methylobacter luteus</i> ACM 3304 <sup>T</sup>       | AF304195.1        | —          |
| <i>Methylobacter luteus</i> IMV-B-3098*                 | —                 | ATYJ01     |
| <i>Methylobacter marinus</i> A45 <sup>T</sup>           | AF304197.1        | ARVS01     |
| <i>Methylobacter psychrophilus</i> Z-0021 <sup>T</sup>  | AF152597.1        | AAX48776.1 |
| <i>Methylobacter tundripaludum</i> SV96 <sup>T</sup>    | AJ414655.1        | AEGW02     |
| <i>Methylobacter whittenburyi</i> ACM 3310 <sup>T</sup> | X72773.1          | NA         |
| <i>Methylocaldum gracile</i> VKM-14L <sup>T</sup>       | U89298.1          | AAC04380.1 |
| <i>Methylocaldum marinum</i> S8 <sup>T</sup>            | AB894129.1        | BAO51827.1 |
| <i>Methylocaldum szegediense</i> OR2 <sup>T</sup>       | U89300.1          | AAC04381.1 |
| <i>Methylocaldum tepidum</i> LK6 <sup>T</sup>           | U89297.1          | AAC04382.1 |
| <i>Methylococcus capsulatus</i> Texas <sup>T</sup>      | AJ563935.1        | AUKJ01     |
| <i>Methylococcus mobilis</i> LMD 77.28 <sup>T</sup>     | HQ676599.1        | —          |
| <i>Methylococcus thermophilus</i> IMV-2Yu <sup>T</sup>  | X73819.1          | —          |
| <i>“Methylocucumis oryzae”</i> Sn10-6 <sup>T</sup>      | KP793700.1        | LAJX01     |
| <i>Methylogaea oryzae</i> JCM 16910 <sup>T</sup>        | EU672873.1        | BBDL01     |
| <i>Methyloglobulus morosus</i> KoM1 <sup>T</sup>        | JN386974.1        | AYLO01     |
| <i>Methylohalobius crimeensis</i> 10Ki <sup>T</sup>     | AJ581837.1        | BAM71040.1 |
| <i>Methylomagnum ishizawai</i> RS11D-Pr <sup>T</sup>    | AB669155.1        | BAK78887.1 |
| <i>Methylomarinovum caldicuralii</i> IT-9 <sup>T</sup>  | AB301718.2        | BAF62078.2 |
| <i>Methylomarinum vadi</i> IT-4 <sup>T</sup>            | AB301717.2        | JPON01     |
| <i>Methylomicrobium agile</i> ATCC 35068 <sup>T</sup>   | X72767.1          | JPOJ01     |
| <i>Methylomicrobium album</i> BG8 <sup>T</sup>          | X72777.1          | CM001475.1 |
| <i>Methylomicrobium alcaliphilum</i> 20Z <sup>T</sup>   | EF495157.1        | FO082060.1 |
| <i>“Methylomicrobium buryatense”</i> 5B <sup>T</sup>    | AF307138.1        | AAL09399.1 |
| <i>Methylomicrobium japanense</i> NI <sup>T</sup>       | D89279.1          | BAE86885.1 |
| <i>Methylomicrobium kenyense</i> AMO1 <sup>T</sup>      | AJ132384.1        | NA         |
| <i>Methylomicrobium pelagicum</i> AA-23 <sup>T</sup>    | X72775.1          | —          |

| Species and strain                                        | Accession numbers |            |
|-----------------------------------------------------------|-------------------|------------|
|                                                           | 16S rRNA          | PmoA       |
| <i>Methylomonas aurantiaca</i> JB103 <sup>T</sup>         | X72776.1          | –          |
| “ <i>Methylomonas denitrificans</i> ” FJG1 <sup>T</sup>   | CP014476.1        | CP014476.1 |
| <i>Methylomonas fodinarum</i> LD2 <sup>T</sup>            | X72778.1          | –          |
| <i>Methylomonas koyamae</i> JCM 16701 <sup>T</sup>        | AB538964.1        | BBCK01     |
| <i>Methylomonas lenta</i> R-45377 <sup>T</sup>            | FR798962.1        | CCW45942.1 |
| <i>Methylomonas methanica</i> NCIMB 11130 <sup>T</sup>    | AF304196.1        | LUUF01     |
| <i>Methylomonas paludis</i> MG30 <sup>T</sup>             | HE801216.1        | CCH22593.1 |
| “ <i>Methylomonas rubra</i> ” 15sh <sup>T</sup>           | AF304194.1        | –          |
| <i>Methylomonas scandinavica</i> SR5 <sup>T</sup>         | AJ131369.1        | –          |
| <i>Methyloparacoccus murrellii</i> R-49797 <sup>T</sup>   | HF558990.1        | CCW45946.1 |
| <i>Methyloprofundus sedimenti</i> WF1 <sup>T</sup>        | KF484906.1        | LPUF01     |
| <i>Methylosarcina fibrata</i> AML-C10 <sup>T</sup>        | AF177296.1        | ARCU01     |
| <i>Methylosarcina lacus</i> LW14 <sup>T</sup>             | AY007296.1        | AZUN01     |
| <i>Methylosarcina quisquiliarum</i> AML-D4 <sup>T</sup>   | AF177297.1        | AAF04266.1 |
| <i>Methylosoma difficile</i> LC 2 <sup>T</sup>            | DQ119050.1        | ABD13901.1 |
| <i>Methylosphaera hansonii</i> AM6 <sup>T</sup>           | U67929.1          | –          |
| <i>Methyloterricola oryzae</i> 73a <sup>T</sup>           | JYNS01            | JYNS01     |
| “ <i>Methylothermus subterraneus</i> ” HTM55 <sup>T</sup> | AB536747.2        | BAI52935.1 |
| “ <i>Methylothermus thermalis</i> ” MYHT <sup>T</sup>     | AY829009.1        | AAX37294.1 |
| <i>Methylovulum miyakonense</i> HT12 <sup>T</sup>         | AB501287.1        | AQZU01     |
| <i>Methylovulum psychrotolerans</i> Sph1 <sup>T</sup>     | KT381578.1        | PGFZ01     |
| <i>Methylosinus sporium</i> ACM 3306 <sup>T</sup>         | Y18946.1          | PWB93641.1 |
| <i>Methylosinus trichosporium</i> OB3b <sup>T</sup>       | Y18947.1          | ATQ66669.1 |

Sequence versions are indicated in the NCBI accession numbers. The *PmoA* sequences of *M. whittenburyi* ACM 3310<sup>T</sup> and *M. kenyense* AMO1<sup>T</sup> were obtained from the MicroScope database and therefore have no NCBI accession numbers. Sequences that were not available from type strains were taken from different representative strains (indicated by asterisks). NA, not applicable; –, no sequence available.

**Supplementary Table S2.** Whole-genome sequences used in this study.

| <b>Genome</b>                                           | <b>Accession number</b> |
|---------------------------------------------------------|-------------------------|
| <i>Crenothrix polyspora</i> RSM_CP1                     | FUKI01                  |
| <i>Crenothrix polyspora</i> RSM_CP2                     | FUKJ01                  |
| <i>Crenothrix</i> sp. D3                                | MBQZ01                  |
| <i>Methylobacter luteus</i> IMV-B-3098                  | ATYJ01                  |
| <i>Methylobacter marinus</i> A45 <sup>T</sup>           | ARVS01                  |
| <i>Methylobacter</i> sp. BBA5.1                         | JQKS01                  |
| <i>Methylobacter</i> sp. BC.3.60                        | PESA01                  |
| <i>Methylobacter</i> sp. BC.3.94                        | PERX01                  |
| <i>Methylobacter</i> sp. DS2.3.46                       | PERP01                  |
| <i>Methylobacter</i> sp. DS3.3.25                       | PERK01                  |
| <i>Methylobacter</i> sp. UBA2091                        | DCZF01                  |
| <i>Methylobacter</i> sp. UBA6696                        | DKJI01                  |
| <i>Methylobacter</i> sp. UBA6701                        | DKJD01                  |
| <i>Methylobacter</i> sp. UBA6712                        | DKIS01                  |
| <i>Methylobacter</i> sp. WM.3.3                         | PERF01                  |
| <i>Methylobacter tundripaludum</i> 21/22                | JMLA01                  |
| <i>Methylobacter tundripaludum</i> 31/32                | JPOH01                  |
| <i>Methylobacter tundripaludum</i> OWC-DMM              | PTIZ01                  |
| <i>Methylobacter tundripaludum</i> OWC-G53F             | PTIY01                  |
| <i>Methylobacter tundripaludum</i> SV96 <sup>T</sup>    | AEGW02                  |
| <i>Methylobacter tundripaludum</i> UBA6706              | DKIY01                  |
| <i>Methylobacter whittenburyi</i> ACM 3310 <sup>T</sup> | NA                      |
| <i>Methylobacter whittenburyi</i> UCM-B-3033            | JQNS01                  |
| <i>Methylocaldum</i> sp. 14B                            | MSCV01                  |
| <i>Methylocaldum</i> sp. SAD2                           | MUGL01                  |
| <i>Methylocaldum szegediense</i> O-12                   | ATXX01                  |
| <i>Methylococcaceae</i> bacterium NSM2-1                | NQJI01                  |
| <i>Methylococcaceae</i> bacterium NSO1                  | NQJJ01                  |
| <i>Methylococcaceae</i> bacterium NSP1-1                | NQJG01                  |
| <i>Methylococcaceae</i> bacterium NSP1-2                | NQJH01                  |
| <i>Methylococcaceae</i> bacterium TMED282               | NHMB01                  |
| <i>Methylococcaceae</i> bacterium TMED69                | NHDW01                  |
| <i>Methylococcaceae</i> bacterium UBA1114               | DCBF01                  |
| <i>Methylococcaceae</i> bacterium UBA1147               | DBZZ01                  |
| <i>Methylococcaceae</i> bacterium UBA2778               | DEII01                  |
| <i>Methylococcaceae</i> bacterium UBA2780               | DEIG01                  |
| <i>Methylococcaceae</i> bacterium UBA3127               | DEZR01                  |
| <i>Methylococcaceae</i> bacterium UBA4132               | DFWO01                  |
| <i>Methylococcaceae</i> bacterium UBA5071               | DIAT01                  |
| <i>Methylococcaceae</i> bacterium UBA6146               | DIUY01                  |
| <i>Methylococcaceae</i> bacterium UBA659                | DBNZ01                  |
| <i>Methylococcaceae</i> bacterium UBA662                | DBNW01                  |
| <i>Methylococcaceae</i> bacterium UBA7658               | DLHW01                  |
| <i>Methylococcaceae</i> bacterium UBA975                | DBBV01                  |
| <i>Methylococcales</i> bacterium OPU3 GD OMZ            | MPSY01                  |

| Genome                                                  | Accession number |
|---------------------------------------------------------|------------------|
| <i>Methylococcus capsulatus</i> Bath                    | AE017282.2       |
| <i>Methylococcus capsulatus</i> Texas <sup>T</sup>      | AUKJ01           |
| <i>Methylococcus</i> sp. UBA6136                        | DIVI01           |
| “ <i>Methylococcus oryzae</i> ” Sn10-6 <sup>T</sup>     | LAJX01           |
| <i>Methylogaea oryzae</i> JCM 16910 <sup>T</sup>        | BBDL01           |
| <i>Methyloglobulus morosus</i> KoM1 <sup>T</sup>        | AYLO01           |
| <i>Methylohalobius crimeensis</i> 10Ki <sup>T</sup>     | ATXB01           |
| <i>Methylomagnum ishizawai</i> 175                      | FXAM01           |
| <i>Methylomarinum vadi</i> IT-4 <sup>T</sup>            | JPON01           |
| <i>Methylomicrobium agile</i> ATCC 35068 <sup>T</sup>   | JPOJ01           |
| <i>Methylomicrobium album</i> BG8 <sup>T</sup>          | CM001475.1       |
| <i>Methylomicrobium alcaliphilum</i> 20Z <sup>T</sup>   | FO082060.1       |
| “ <i>Methylomicrobium buryatense</i> ” 5G               | AOTL01           |
| <i>Methylomicrobium kenyense</i> AMO1 <sup>T</sup>      | NA               |
| “ <i>Methylomonas denitrificans</i> ” FJG1 <sup>T</sup> | CP014476.1       |
| <i>Methylomonas koyamae</i> JCM 16701 <sup>T</sup>      | BBCK01           |
| <i>Methylomonas koyamae</i> LM6                         | CP023669.1       |
| <i>Methylomonas koyamae</i> R-45378                     | LUUJ01           |
| <i>Methylomonas koyamae</i> R-45383                     | LUUK01           |
| <i>Methylomonas koyamae</i> R-49807                     | LUUL01           |
| <i>Methylomonas lenta</i> R-45370                       | LUUI01           |
| <i>Methylomonas methanica</i> MC09                      | CP002738.1       |
| <i>Methylomonas methanica</i> NCIMB 11130 <sup>T</sup>  | LUUF01           |
| <i>Methylomonas methanica</i> R-45363                   | LUUG01           |
| <i>Methylomonas methanica</i> R-45371                   | LUUH01           |
| <i>Methylomonas</i> sp. 11b                             | AZ XK01          |
| <i>Methylomonas</i> sp. BC.006                          | PESC01           |
| <i>Methylomonas</i> sp. DH-1                            | CP014360.1       |
| <i>Methylomonas</i> sp. DS1.022                         | PERS01           |
| <i>Methylomonas</i> sp. DS1.3.54                        | PERR01           |
| <i>Methylomonas</i> sp. DS2.3.37                        | PERQ01           |
| <i>Methylomonas</i> sp. FW.001                          | PERW01           |
| <i>Methylomonas</i> sp. FW.007                          | PERU01           |
| <i>Methylomonas</i> sp. FW.017                          | PERV01           |
| <i>Methylomonas</i> sp. Kb3                             | PIZT01           |
| <i>Methylomonas</i> sp. LW13                            | JNLB01           |
| <i>Methylomonas</i> sp. LWB                             | MKMC01           |
| <i>Methylomonas</i> sp. MK1                             | AQOV01           |
| <i>Methyloprofundus sedimenti</i> WF1 <sup>T</sup>      | LPUF01           |
| <i>Methylosarcina fibrata</i> AML-C10 <sup>T</sup>      | ARCU01           |
| <i>Methylosarcina lacus</i> LW14 <sup>T</sup>           | AZUN01           |
| <i>Methyloterricola oryzae</i> 73a <sup>T</sup>         | JYNS01           |
| <i>Methylothermaceae</i> bacterium B42                  | LSNW01           |
| <i>Methylovulum miyakonense</i> HT12 <sup>T</sup>       | AQZU01           |
| <i>Methylovulum psychrotolerans</i> HV10-M2             | CP022129.1       |
| <i>Methylovulum psychrotolerans</i> Sph1 <sup>T</sup>   | PGFZ01           |
| <i>Methylosinus sporium</i> ACM 3306 <sup>T</sup>       | PUIV01           |

| Genome                                              | Accession number |
|-----------------------------------------------------|------------------|
| <i>Methylosinus trichosporium</i> OB3b <sup>T</sup> | CP023737.1       |

*Sequence versions are indicated in the NCBI accession numbers. The genome sequences of M. whittenburyi ACM 3310<sup>T</sup> and M. kenyense AMO1<sup>T</sup> were obtained from the MicroScope database and therefore have no NCBI accession numbers. NA, not applicable.*



Values are shown for AAI (green–purple, lower left) and POCP (yellow–blue, upper right). Boxed regions indicate inferred genus clusters with at least two members based on AAI comparisons, as well as monophyly in the genome-based phylogeny. POCP was not used to infer genera. Asterisks after reclassified names indicate later heterotypic synonyms of their senior counterparts in the same species clusters as shown in Figure 2.







**Supplementary Table S5.** Reclassification of the *Methylococcales* genomes.

| Previous name                                           | Name after reclassification                               | Genus cluster | Species cluster | G+C of DNA (mol%) | Genome size (bp) |
|---------------------------------------------------------|-----------------------------------------------------------|---------------|-----------------|-------------------|------------------|
| <i>Crenothrix polyspora</i> RSM_CP1                     | <i>Crenothrix polyspora</i> RSM_CP1                       | 6             | 20              | 44.24             | 3,921,762        |
| <i>Crenothrix polyspora</i> RSM_CP2                     | <i>Crenothrix</i> sp. RSM_CP2                             | 6             | 21              | 44.73             | 3,527,685        |
| <i>Crenothrix</i> sp. D3                                | <i>Methylococcaceae</i> bacterium D3                      | 4             | 17              | 42.18             | 3,633,770        |
| <i>Methylobacter luteus</i> IMV-B-3098                  | <i>Methylobacter luteus</i> IMV-B-3098                    | 1             | 10              | 51.13             | 5,027,778        |
| <i>Methylobacter marinus</i> A45 <sup>T</sup>           | <i>Methylobacter marinus</i> A45 <sup>T</sup>             | 1             | 9               | 52.67             | 4,987,856        |
| <i>Methylobacter</i> sp. BBA5.1                         | <i>Methylobacter marinus</i> BBA5.1                       | 1             | 9               | 52.24             | 5,071,908        |
| <i>Methylobacter</i> sp. BC.3.60                        | <i>Methylococcaceae</i> bacterium BC.3.60                 | 7             | 22              | 45.33             | 1,321,518        |
| <i>Methylobacter</i> sp. BC.3.94                        | <i>Methylovulum miyakonense</i> BC.3.94                   | 2             | 11              | 50.52             | 4,467,756        |
| <i>Methylobacter</i> sp. DS2.3.46                       | <i>Methylococcaceae</i> bacterium DS2.3.46                | 15            | 32              | 48.79             | 3,075,382        |
| <i>Methylobacter</i> sp. DS3.3.25                       | <i>Methylococcaceae</i> bacterium DS3.3.25                | 15            | 32              | 49.80             | 2,753,434        |
| <i>Methylobacter</i> sp. UBA2091                        | <i>Methylobacter</i> sp. UBA2091                          | 1             | 1               | 49.28             | 3,970,437        |
| <i>Methylobacter</i> sp. UBA6696                        | <i>Methylobacter</i> sp. UBA6696                          | 1             | 1               | 49.27             | 3,961,971        |
| <i>Methylobacter</i> sp. UBA6701                        | <i>Methylobacter</i> sp. UBA6701                          | 1             | 2               | 49.26             | 3,793,708        |
| <i>Methylobacter</i> sp. UBA6712                        | <i>Methylobacter</i> sp. UBA6712                          | 1             | 2               | 48.86             | 4,212,994        |
| <i>Methylobacter</i> sp. WM.3.3                         | <i>Methylococcaceae</i> bacterium WM.3.3                  | 15            | 32              | 49.39             | 2,673,132        |
| <i>Methylobacter tundripaludum</i> 21/22                | <i>Methylobacter</i> sp. 21/22                            | 1             | 3               | 49.46             | 4,665,210        |
| <i>Methylobacter tundripaludum</i> 31/32                | <i>Methylobacter</i> sp. 31/32                            | 1             | 3               | 49.24             | 5,047,546        |
| <i>Methylobacter tundripaludum</i> OWC-DMM              | <i>Methylobacter</i> sp. OWC-DMM                          | 1             | 1               | 49.47             | 4,607,785        |
| <i>Methylobacter tundripaludum</i> OWC-G53F             | <i>Methylobacter</i> sp. OWC-G53F                         | 1             | 6               | 50.46             | 4,180,651        |
| <i>Methylobacter tundripaludum</i> SV96 <sup>T</sup>    | <i>Methylobacter tundripaludum</i> SV96 <sup>T</sup>      | 1             | 5               | 49.51             | 4,846,919        |
| <i>Methylobacter tundripaludum</i> UBA6706              | <i>Methylobacter</i> sp. UBA6706                          | 1             | 4               | 49.44             | 3,565,077        |
| <i>Methylobacter whittenburyi</i> ACM 3310 <sup>T</sup> | <i>Methylobacter whittenburyi</i> ACM 3310 <sup>T</sup> * | 1             | 9               | 51.98             | 5,440,158        |
| <i>Methylobacter whittenburyi</i> UCM-B-3033            | <i>Methylobacter marinus</i> UCM-B-3033                   | 1             | 9               | 51.98             | 5,440,158        |
| <i>Methylocaldum</i> sp. 14B                            | <i>Methylocaldum</i> sp. 14B                              | 27            | 59              | 58.24             | 5,621,438        |
| <i>Methylocaldum</i> sp. SAD2                           | <i>Methylocaldum</i> sp. SAD2                             | 27            | 59              | 58.18             | 5,907,411        |
| <i>Methylocaldum szegediense</i> O-12                   | <i>Methylocaldum szegediense</i> O-12                     | 27            | 60              | 57.15             | 5,011,695        |
| <i>Methylococcaceae</i> bacterium NSM2-1                | <i>Methylobacter</i> sp. NSM2-1                           | 1             | 8               | 44.82             | 1,901,400        |
| <i>Methylococcaceae</i> bacterium NSO1                  | <i>Methylobacter</i> sp. NSO1                             | 1             | 7               | 43.92             | 1,404,415        |
| <i>Methylococcaceae</i> bacterium NSP1-1                | <i>Methylobacter</i> sp. NSP1-1                           | 1             | 7               | 44.25             | 1,667,819        |
| <i>Methylococcaceae</i> bacterium NSP1-2                | <i>Methylococcaceae</i> bacterium NSP1-2                  | 4             | 18              | 42.81             | 2,718,667        |
| <i>Methylococcaceae</i> bacterium TMED282               | <i>Methylococcaceae</i> bacterium TMED282                 | 10            | 26              | 43.73             | 1,499,574        |
| <i>Methylococcaceae</i> bacterium TMED69                | <i>Methylococcaceae</i> bacterium TMED69                  | 11            | 27              | 38.55             | 1,973,107        |
| <i>Methylococcaceae</i> bacterium UBA1114               | <i>Methylococcaceae</i> bacterium UBA1114                 | 8             | 23              | 42.83             | 2,173,118        |



| Previous name                                           | Name after reclassification                                | Genus cluster | Species cluster | G+C of DNA (mol%) | Genome size (bp) |
|---------------------------------------------------------|------------------------------------------------------------|---------------|-----------------|-------------------|------------------|
| <i>Methylococcaceae</i> bacterium UBA1147               | <i>Methylococcaceae</i> bacterium UBA1147                  | 21            | 53              | 53.15             | 2,103,507        |
| <i>Methylococcaceae</i> bacterium UBA2778               | <i>Methylococcaceae</i> bacterium UBA2778                  | 22            | 54              | 55.65             | 3,927,269        |
| <i>Methylococcaceae</i> bacterium UBA2780               | <i>Methylococcaceae</i> bacterium UBA2780                  | 9             | 25              | 44.90             | 2,373,821        |
| <i>Methylococcaceae</i> bacterium UBA3127               | <i>Methylococcaceae</i> bacterium UBA3127                  | 4             | 16              | 42.18             | 3,099,008        |
| <i>Methylococcaceae</i> bacterium UBA4132               | <i>Methylococcaceae</i> bacterium UBA4132                  | 4             | 16              | 42.15             | 3,069,361        |
| <i>Methylococcaceae</i> bacterium UBA5071               | <i>Methylococcaceae</i> bacterium UBA5071                  | 4             | 16              | 42.15             | 3,132,147        |
| <i>Methylococcaceae</i> bacterium UBA6146               | <i>Methylovulum</i> sp. UBA6146                            | 2             | 13              | 48.50             | 3,187,382        |
| <i>Methylococcaceae</i> bacterium UBA659                | <i>Methylococcaceae</i> bacterium UBA659                   | 3             | 14              | 51.40             | 2,140,836        |
| <i>Methylococcaceae</i> bacterium UBA662                | <i>Methylococcaceae</i> bacterium UBA662                   | 3             | 15              | 52.99             | 2,387,527        |
| <i>Methylococcaceae</i> bacterium UBA7658               | <i>Methyloglobulus</i> sp. UBA7658                         | 14            | 30              | 46.81             | 3,709,136        |
| <i>Methylococcaceae</i> bacterium UBA975                | <i>Methylococcaceae</i> bacterium UBA975                   | 8             | 24              | 44.76             | 2,328,141        |
| <i>Methylococcales</i> bacterium OPU3_GD_OMZ            | <i>Methylococcaceae</i> bacterium OPU3_GD_OMZ              | 12            | 28              | 42.32             | 2,094,096        |
| <i>Methylococcus capsulatus</i> Bath                    | <i>Methylococcus capsulatus</i> Bath                       | 23            | 55              | 63.58             | 3,304,560        |
| <i>Methylococcus capsulatus</i> Texas <sup>T</sup>      | <i>Methylococcus capsulatus</i> Texas <sup>T</sup>         | 23            | 55              | 63.56             | 3,263,814        |
| <i>Methylococcus</i> sp. UBA6136                        | <i>Methylococcaceae</i> bacterium UBA6136                  | 28            | 61              | 57.14             | 2,440,517        |
| “ <i>Methylocucumis oryzae</i> ” Sn10-6 <sup>T</sup>    | “ <i>Methylocucumis oryzae</i> ” Sn10-6 <sup>T</sup>       | 5             | 19              | 43.87             | 4,583,004        |
| <i>Methylogaea oryzae</i> JCM 16910 <sup>T</sup>        | <i>Methylogaea oryzae</i> JCM 16910 <sup>T</sup>           | 26            | 58              | 62.55             | 3,696,254        |
| <i>Methyloglobulus morosus</i> KoM1 <sup>T</sup>        | <i>Methyloglobulus morosus</i> KoM1 <sup>T</sup>           | 14            | 31              | 47.32             | 4,136,844        |
| <i>Methylohalobius crimeensis</i> 10Ki <sup>T</sup>     | <i>Methylohalobius crimeensis</i> 10Ki <sup>T</sup>        | 29            | 62              | 58.28             | 3,509,607        |
| <i>Methylomagnum ishizawai</i> 175                      | <i>Methylomagnum ishizawai</i> 175                         | 25            | 57              | 62.96             | 5,480,099        |
| <i>Methylomarinum vadi</i> IT-4 <sup>T</sup>            | <i>Methylomarinum vadi</i> IT-4 <sup>T</sup>               | 17            | 46              | 51.29             | 4,335,162        |
| <i>Methylomicrobium agile</i> ATCC 35068 <sup>T</sup>   | <i>Methylomicrobium agile</i> ATCC 35068 <sup>T</sup>      | 19            | 50              | 56.17             | 4,526,071        |
| <i>Methylomicrobium album</i> BG8 <sup>T</sup>          | <i>Methylomicrobium album</i> BG8 <sup>T*</sup>            | 19            | 50              | 56.25             | 4,493,344        |
| <i>Methylomicrobium alcaliphilum</i> 20Z <sup>T</sup>   | <i>Methylothemobacterium alcaliphilum</i> 20Z <sup>T</sup> | 18            | 47              | 48.74             | 4,796,711        |
| “ <i>Methylomicrobium buryatense</i> ” 5G               | “ <i>Methylothemobacterium buryatense</i> ” 5G             | 18            | 48              | 48.71             | 5,064,796        |
| <i>Methylomicrobium kenyense</i> AMO1 <sup>T</sup>      | <i>Methylothemobacterium kenyense</i> AMO1 <sup>T</sup>    | 18            | 49              | 50.16             | 4,474,416        |
| “ <i>Methylomonas denitrificans</i> ” FJG1 <sup>T</sup> | “ <i>Methylomonas denitrificans</i> ” FJG1 <sup>T*</sup>   | 16            | 38              | 51.66             | 5,172,098        |
| <i>Methylomonas koyamae</i> JCM 16701 <sup>T</sup>      | <i>Methylomonas koyamae</i> JCM 16701 <sup>T</sup>         | 16            | 39              | 56.05             | 4,954,151        |
| <i>Methylomonas koyamae</i> LM6                         | <i>Methylomonas koyamae</i> LM6                            | 16            | 39              | 56.23             | 5,080,660        |
| <i>Methylomonas koyamae</i> R-45378                     | <i>Methylomonas</i> sp. R-45378                            | 16            | 40              | 56.06             | 5,115,236        |
| <i>Methylomonas koyamae</i> R-45383                     | <i>Methylomonas</i> sp. R-45383                            | 16            | 41              | 55.85             | 5,414,320        |
| <i>Methylomonas koyamae</i> R-49807                     | <i>Methylomonas koyamae</i> R-49807                        | 16            | 39              | 55.86             | 5,179,245        |
| <i>Methylomonas lenta</i> R-45370                       | <i>Methylomonas lenta</i> R-45370                          | 16            | 43              | 46.63             | 4,703,858        |
| <i>Methylomonas methanica</i> MC09                      | <i>Methylomonas</i> sp. MC09                               | 16            | 44              | 51.31             | 5,051,681        |
| <i>Methylomonas methanica</i> NCIMB 11130 <sup>T</sup>  | <i>Methylomonas methanica</i> NCIMB 11130 <sup>T</sup>     | 16            | 38              | 51.67             | 5,023,270        |



| Previous name                                         | Name after reclassification                           | Genus cluster | Species cluster | G+C of DNA (mol%) | Genome size (bp) |
|-------------------------------------------------------|-------------------------------------------------------|---------------|-----------------|-------------------|------------------|
| <i>Methylomonas methanica</i> R-45363                 | <i>Methylomonas</i> sp. R-45363                       | 16            | 33              | 51.29             | 5,407,230        |
| <i>Methylomonas methanica</i> R-45371                 | <i>Methylomonas</i> sp. R-45371                       | 16            | 34              | 51.27             | 5,482,877        |
| <i>Methylomonas</i> sp. 11b                           | <i>Methylomonas</i> sp. 11b                           | 16            | 35              | 51.40             | 5,412,616        |
| <i>Methylomonas</i> sp. BC.006                        | <i>Methylomonas</i> sp. BC.006                        | 16            | 42              | 56.11             | 2,569,055        |
| <i>Methylomonas</i> sp. DH-1                          | <i>Methylomonas koyamae</i> DH-1                      | 16            | 39              | 56.21             | 5,127,407        |
| <i>Methylomonas</i> sp. DS1.022                       | <i>Methylomonas</i> sp. DS1.022                       | 16            | 42              | 56.48             | 2,850,821        |
| <i>Methylomonas</i> sp. DS1.3.54                      | <i>Methylomonas</i> sp. DS1.3.54                      | 16            | 42              | 56.50             | 2,478,482        |
| <i>Methylomonas</i> sp. DS2.3.37                      | <i>Methylomonas</i> sp. DS2.3.37                      | 16            | 42              | 56.14             | 2,570,809        |
| <i>Methylomonas</i> sp. FW.001                        | <i>Methylomonas</i> sp. FW.001                        | 16            | 42              | 55.96             | 2,324,165        |
| <i>Methylomonas</i> sp. FW.007                        | <i>Methylomonas</i> sp. FW.007                        | 16            | 45              | 48.36             | 4,032,484        |
| <i>Methylomonas</i> sp. FW.017                        | <i>Methylococcaceae</i> bacterium FW.017              | 15            | 32              | 49.21             | 2,488,664        |
| <i>Methylomonas</i> sp. Kb3                           | <i>Methylomonas</i> sp. Kb3                           | 16            | 37              | 51.81             | 5,121,132        |
| <i>Methylomonas</i> sp. LW13                          | <i>Methylomonas</i> sp. LW13                          | 16            | 37              | 51.80             | 5,200,804        |
| <i>Methylomonas</i> sp. LWB                           | <i>Methylomonas</i> sp. LWB                           | 16            | 41              | 55.93             | 5,365,240        |
| <i>Methylomonas</i> sp. MK1                           | <i>Methylomonas</i> sp. MK1                           | 16            | 36              | 51.47             | 5,233,591        |
| <i>Methyloprofundus sedimenti</i> WF1 <sup>T</sup>    | <i>Methyloprofundus sedimenti</i> WF1 <sup>T</sup>    | 13            | 29              | 41.02             | 4,290,526        |
| <i>Methylosarcina fibrata</i> AML-C10 <sup>T</sup>    | <i>Methylosarcina fibrata</i> AML-C10 <sup>T</sup>    | 20            | 52              | 54.07             | 4,978,052        |
| <i>Methylosarcina lacus</i> LW14 <sup>T</sup>         | <i>Methylomicrobium lacus</i> LW14 <sup>T</sup>       | 19            | 51              | 54.67             | 4,384,919        |
| <i>Methyloterricola oryzae</i> 73a <sup>T</sup>       | <i>Methyloterricola oryzae</i> 73a <sup>T</sup>       | 24            | 56              | 61.10             | 4,902,365        |
| <i>Methylothermaceae</i> bacterium B42                | <i>Methylothermaceae</i> bacterium B42                | 30            | 63              | 51.47             | 3,040,036        |
| <i>Methylovulum miyakonense</i> HT12 <sup>T</sup>     | <i>Methylovulum miyakonense</i> HT12 <sup>T</sup>     | 2             | 11              | 50.66             | 4,686,311        |
| <i>Methylovulum psychrotolerans</i> HV10-M2           | <i>Methylovulum psychrotolerans</i> HV10-M2           | 2             | 12              | 50.88             | 4,923,391        |
| <i>Methylovulum psychrotolerans</i> Sph1 <sup>T</sup> | <i>Methylovulum psychrotolerans</i> Sph1 <sup>T</sup> | 2             | 12              | 50.85             | 5,162,352        |

Asterisks after reclassified names indicate later heterotypic synonyms of their senior counterparts in the same species clusters.



## 2. Supplementary Figures

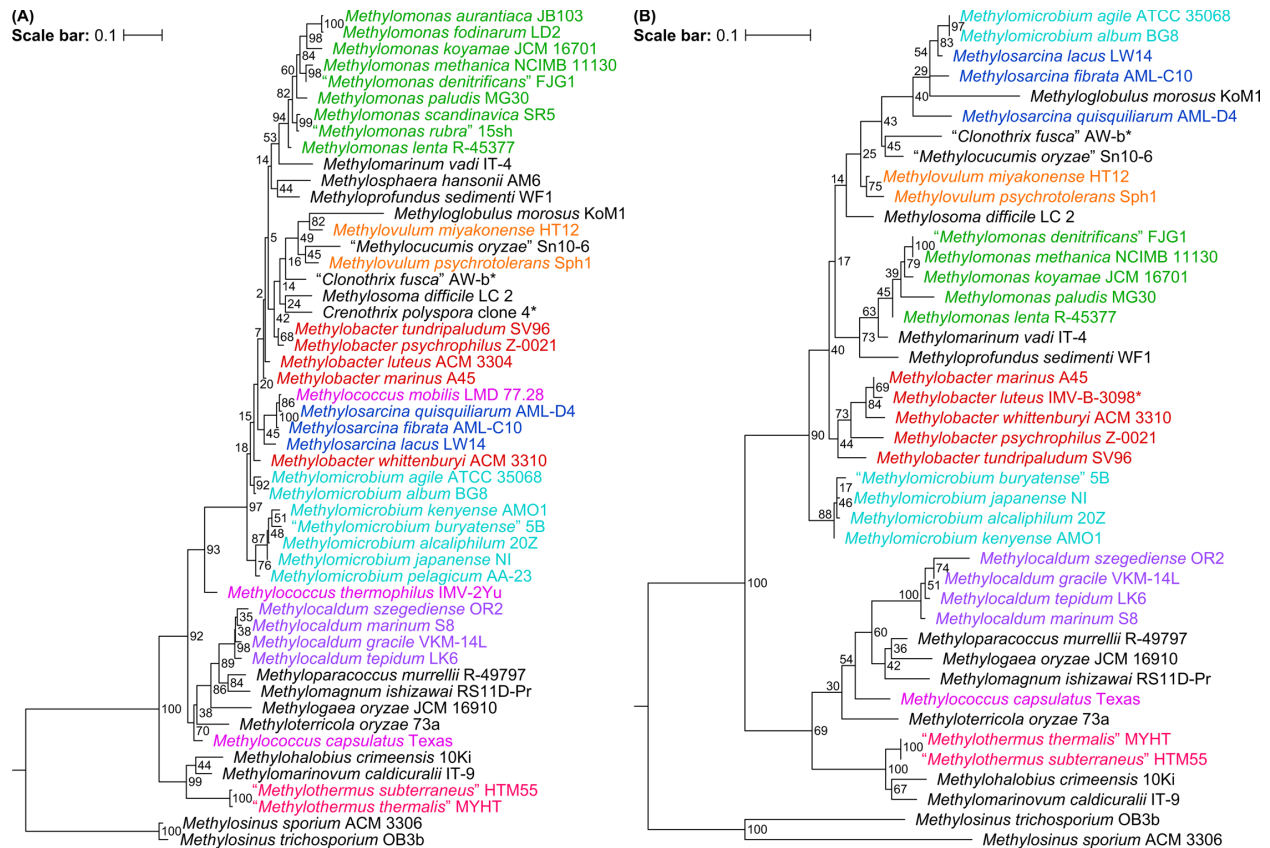

**Supplementary Figure S1.** The phylogenetic relationship of *Methylococcales* type and representative strains based on (A) 16S rRNA and (B) PmoA sequences. The phylogenetic trees are the same trees as in Figure 1 but expanded to show all nodes and bootstrap support.



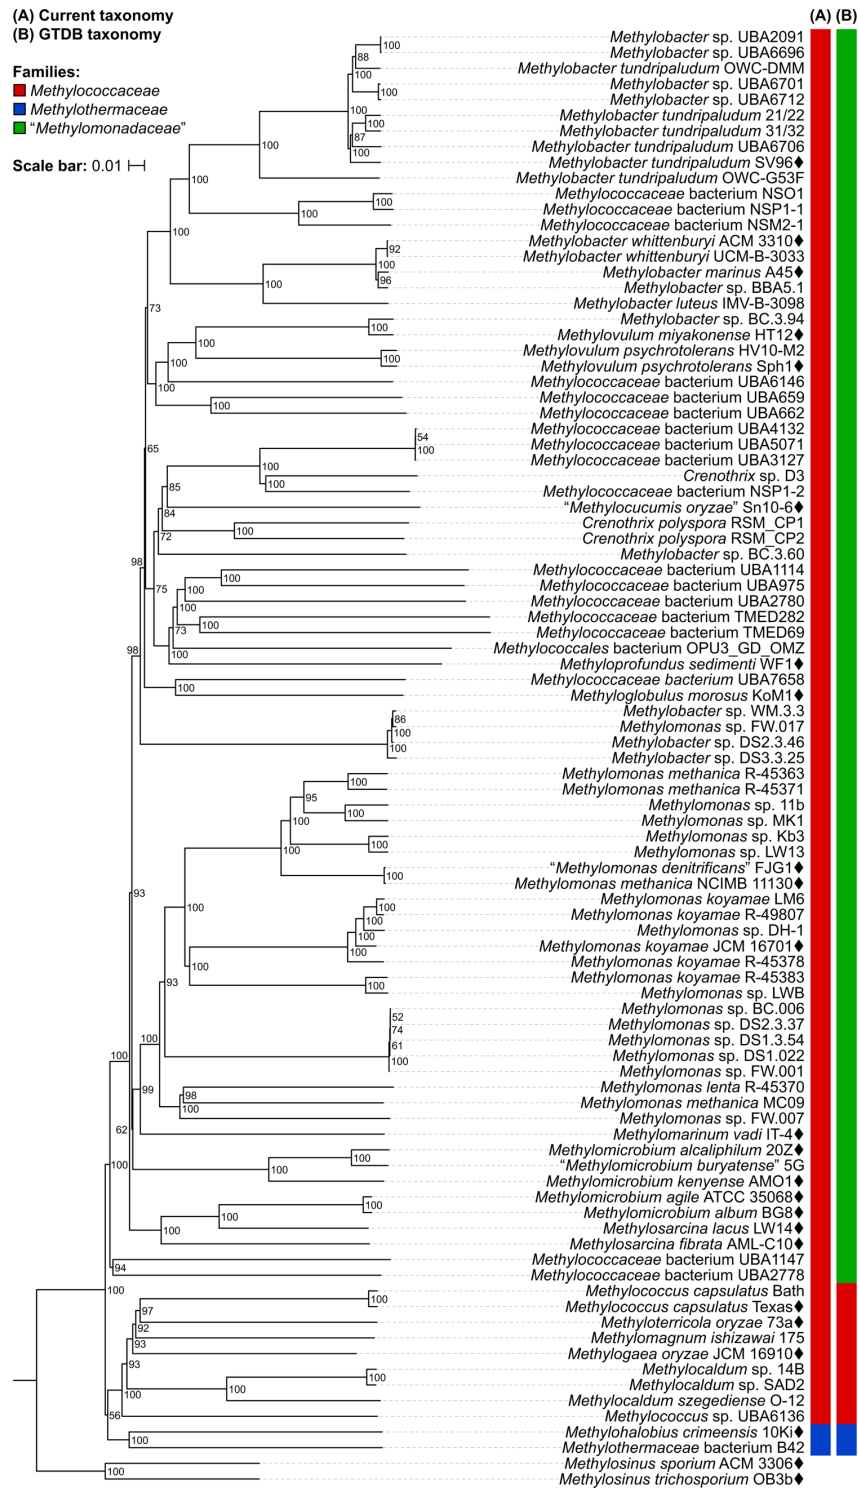

**Supplementary Figure S2.** The phylogenetic relationship of the *Methylococcales* genomes and their family designations. The phylogenetic tree is the same tree as in Figure 2. (A) The genus *Crenothrix* is listed under family *Methylococcaceae* in the *Bergey's Manual of Systematics of Archaea and Bacteria* (Bowman, 2016) and the Genome Taxonomy Database (GTDB) (Parks et al., 2018) but is listed under *Crenotrichaceae* in the List of Prokaryotic Names with Standing in Nomenclature (Parte, 2014). (B) GTDB taxonomy proposed family-level reclassification.

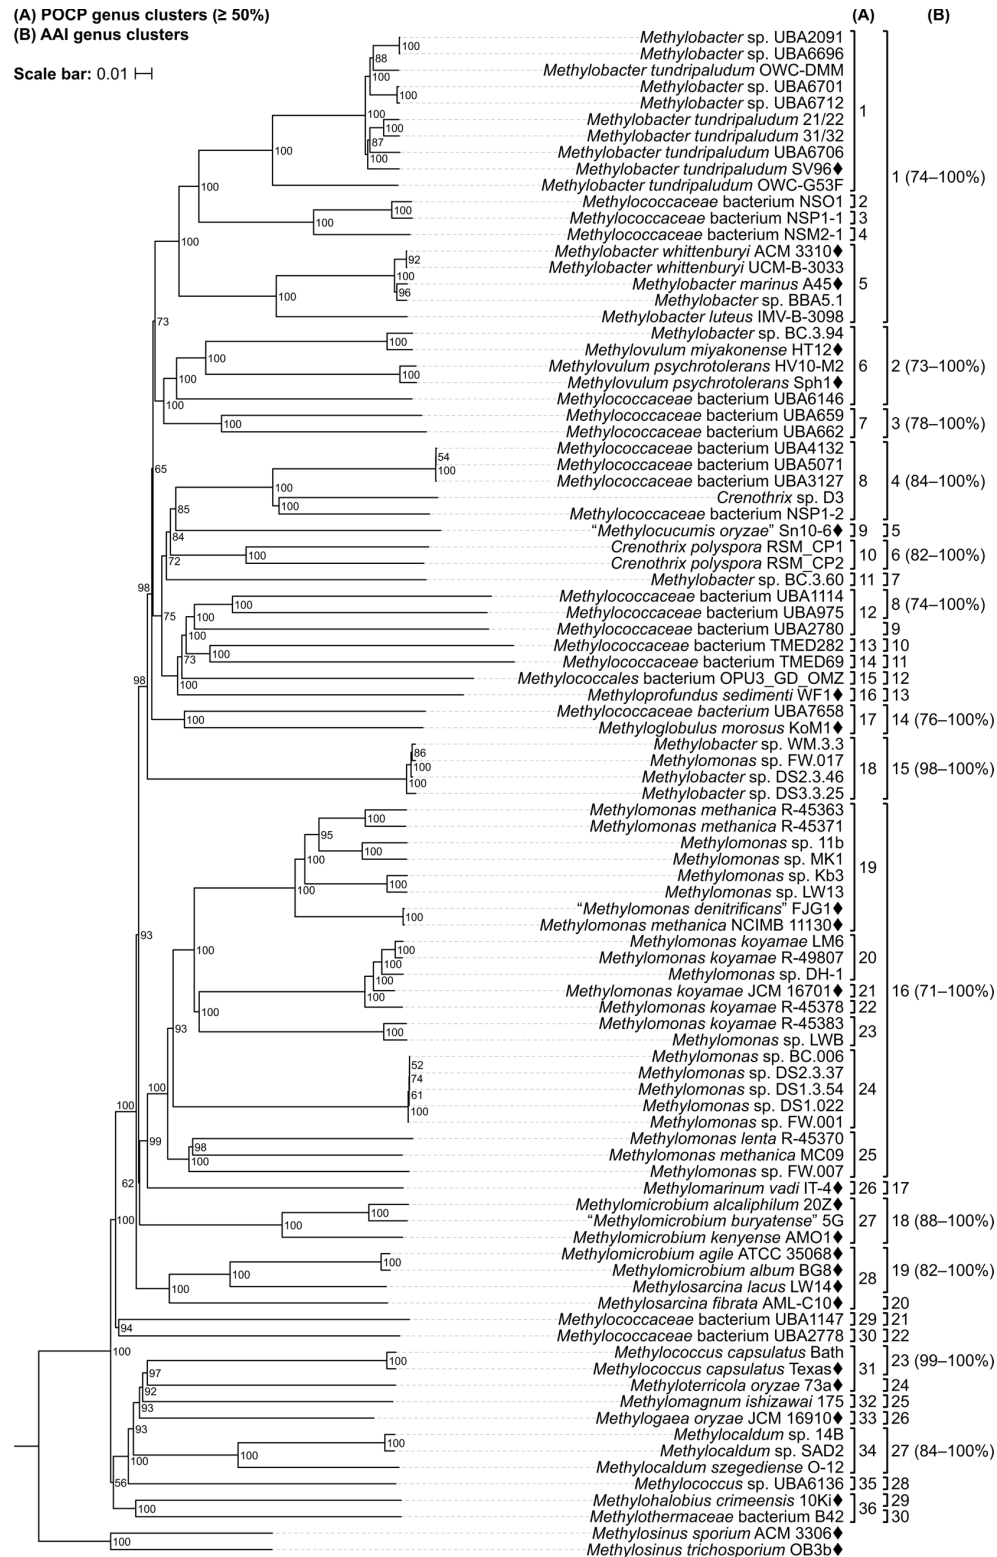

**Supplementary Figure S3.** Inferred genus clusters based on (A) POCP and (B) AAI. The phylogenetic tree is the same tree as in Figure 2. (A) Inferred genus clusters based on monophyly and the 50% POCP threshold for genus delineation (Qin et al., 2014). (B) AAI range values are indicated for every inferred genus cluster based on monophyly and AAI.



### 3. Supplementary References

Bowman, J.P. (2016). “*Methylococcaceae*,” in *Bergey’s Manual of Systematics of Archaea and Bacteria*, eds. W.B. Whitman, F. Rainey, P. Kämpfer, M. Trujillo, J. Chun, P. De Vos, B. Hedlund & S. Dedysh. (Hoboken, NJ: John Wiley & Sons, Inc.).

Parks, D.H., Chuvochina, M., Waite, D.W., Rinke, C., Skarszewski, A., Chaumeil, P.A., et al. (2018). A standardized bacterial taxonomy based on genome phylogeny substantially revises the tree of life. *Nat. Biotechnol.* 36, 996-1004. doi: 10.1038/nbt.4229.

Parte, A.C. (2014). LPSN—list of prokaryotic names with standing in nomenclature. *Nucleic Acids Res.* 42, D613-D616. doi: 10.1093/nar/gkt1111.

Qin, Q.L., Xie, B.B., Zhang, X.Y., Chen, X.L., Zhou, B.C., Zhou, J., et al. (2014). A proposed genus boundary for the prokaryotes based on genomic insights. *J. Bacteriol.* 196, 2210-2215. doi: 10.1128/JB.01688-14.
